# Supplementary material
Source: ML conference proceedings conference paper supplement (https://openreview.net/forum?id=RFmezNsPWV)
Supplement: supplementary_material [file appendix_dexvla.pdf › appendix_dexvla.pdf]

## A Related Work

**Vision-Language-Action models for robot control.** Recent research has focused on developing generalist robot policies trained on increasingly expansive robot learning datasets [36, 37, 23, 24, 38, 3, 39, 40, 41]. Vision-language-action models (VLA) [20, 8, 42, 43, 9, 19, 44, 45, 46] represent a promising approach for training such generalist policies. VLAs adapt vision-language models, pre-trained on vast internet-scale image and text data, for robotic control [47]. This approach offers several advantages: leveraging large vision-language model backbones, with billions of parameters, provides the necessary capacity for fitting extensive robot datasets. Furthermore, reusing weights pre-trained on internet-scale data enhances the ability of VLAs to interpret diverse language commands and generalize to novel objects and environments. However, current VLA models do not specifically focus on learning dexterous robotic skills by leveraging the parameters of the underlying VLM. While a few works, such as  $\pi_0$  [8] and TinyVLA [43], introduce external action experts to facilitate action learning, their training pipelines still rely on the entire model. Another challenge is that even advanced methods like  $\pi_0$ , despite being capable of completing highly dexterous and long-horizon tasks, require the assistance of a high-level policy, such as SayCan [35], to decompose tasks into sub-goals. This allows the VLA to complete sub-tasks sequentially. We aim to integrate this high-level planning capability directly into the model itself by training each component of the network with data annotated at the sub-step level. Consequently, our method can complete complex tasks, like laundry folding, without requiring an external high-level policy, making the entire framework more end-to-end and demonstrating significant potential.

**Diffusion models.** Diffusion models [48, 49, 50] have emerged as the dominant approach in visual generation. The Diffusion Policy [30] successfully applies the diffusion model to robot learning, demonstrating its ability to model multimodal action distributions. Subsequent research has further developed the Diffusion Policy [51, 52, 53, 7, 54, 55, 56, 57, 58, 59, 60, 61, 62, 63] by applying it to 3D environments [64, 65, 66, 67], scaling its capabilities [29], improving its efficiency [68, 53], and incorporating architectural innovations. There are a number of works investigating the usage of diffusion VLA [43, 8, 69]. Although existing models achieve strong performance and generalization on diverse tasks, they predominantly rely on the capabilities of pre-trained vision-language models. This work proposes a paradigm shift towards the diffusion module, demonstrating that a newly designed diffusion-based action expert, coupled with a novel training strategy, enables VLA models to learn from data more efficiently and effectively.

## B More Experimental Results

### B.1 Visual generalization.

Visual generalization is a critical aspect of robot learning. A well-trained model should not only perform well on in-domain tasks but also generalize to different objects within the same category and to novel scenes. This section presents our visual generalization tests. Specifically, we evaluate shirt folding on a bimanual AgileX and drink pouring using a Franka Emika robot with a dexterous hand. The former task is evaluated without task-specific adaptation, while the latter is trained with 100 demonstrations of the new embodiment. These tasks were also the focus of the experiments presented in Section 3.1 and Section 3.2, respectively. For both tasks, we assess visual generalization across two dimensions: novel objects and novel scenes.

For shirt folding, we varied the shirt color (while maintaining size) and altered the background and scene. For drink pouring, we used unseen cups and bottles, also evaluating the task in different scenes and backgrounds. The results are presented in Table 4. Our experiments demonstrate that DexVLA effectively generalizes to novel visual environments. As shown in the supplementary video, the model successfully handles even challenging cases, such as folding white shirts on a white table. The examples are shown in Figure 10.

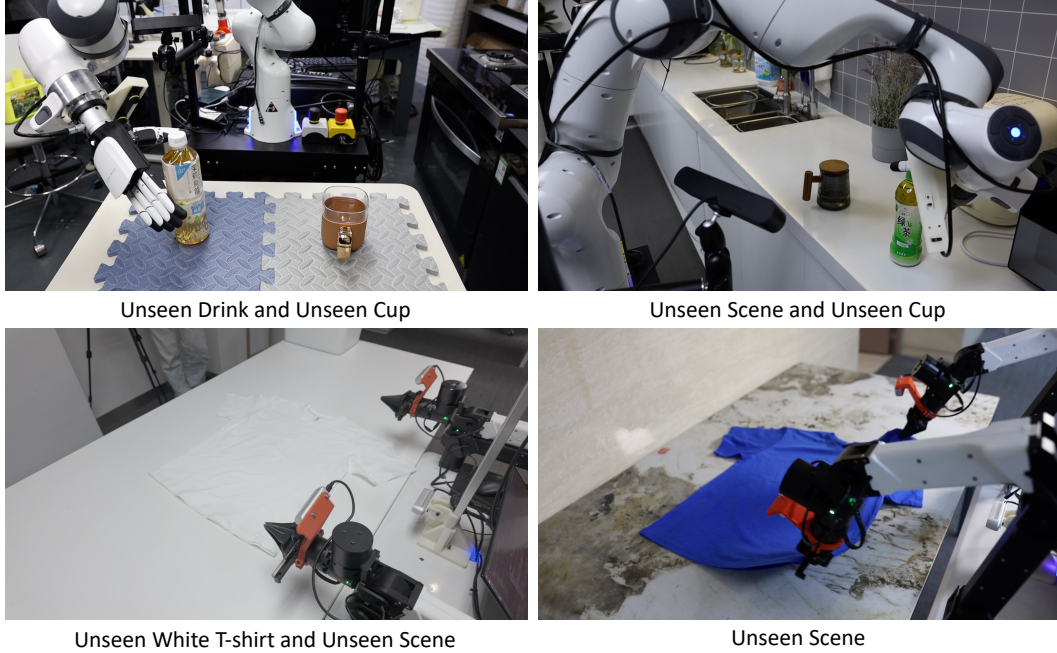

Figure 10: **Example of visual generalization.** Here lists some visual generalization settings including unseen objects and unseen scenes.

Table 4: **Visual Generalization for DexVLA.** For each evaluation setting, we report the averaged scores across 3 trials.

| Task / Generalization | Embodiment      | Novel Object | Novel Scene | Novel Object & Scene |
|-----------------------|-----------------|--------------|-------------|----------------------|
| Shirt folding         | Bimanual AgileX | 0.78         | 0.78        | 0.56                 |
| Drink pouring         | Dexterous hand  | 0.83         | 0.67        | 0.67                 |

## 524 B.2 LIBERO simulation experimental results.

525 We compare our method on the Libero benchmark. DexVLA uses Stage 1 pre-trained weights.  
 526 Specifically, the experimental results in Table 5 show that DexVLA outperforms all baselines, in-  
 527 cluding  $\pi_0$  and  $\pi_0$ -FAST, two state-of-the-art VLA methods, demonstrating strong performance on  
 528 the benchmark.

## 529 B.3 Training cost of stage 1.

530 As mentioned in Section 2.2, training the entire VLA model from scratch results in failure on nearly  
 531 all tasks. Therefore, this section compares the training cost of our Stage 1 (training only the diffusion  
 532 expert) with that of training the entire VLA model. The test reports the number of training epochs  
 533 completed per hour. We deliberately keep the same batch size for fair comparison.

534 As shown in Table 6, training only the diffusion expert is 2.78 times faster than training the entire  
 535 VLA model. This is expected, as the VLA model is three times larger than the diffusion expert  
 536 alone. This highlights that our training strategy is not only effective but also cost-efficient.

## 537 B.4 More discussion on long-horizon tasks with direct prompting.

538 In 3.3, we previously compared DexVLA with  $\pi_0$ , Octo, and OpenVLA on laundry folding and  
 539 bussing table hard. Here, we present additional results against OpenVLA and Octo on more com-  
 540 plex tasks. As shown in Figure 11, DexVLA consistently outperforms all baselines, achieving 0.8

Table 5: **Evaluations results on LIBERO.** We compare our DexVLA with DP and OpenVLA.

| Method        | Spatial     | Object      | Goal        | Average     |
|---------------|-------------|-------------|-------------|-------------|
| DP            | 78.3        | 92.5        | 68.3        | 79.7        |
| OpenVLA       | 84.7        | 88.4        | 79.2        | 84.1        |
| $\pi_0$ -FAST | 96.4        | 96.8        | 88.6        | 93.9        |
| $\pi_0$       | 96.8        | 98.8        | <b>95.8</b> | 97.1        |
| <b>DexVLA</b> | <b>97.2</b> | <b>99.1</b> | 95.6        | <b>97.3</b> |

Table 6: **Comparison of training cost for train only diffusion expert versus train entire VLA.** Training cost is measured by the number of training epochs completed per hour.

| Train Method  | Train only Diffusion Expert | Train Entire VLA  |
|---------------|-----------------------------|-------------------|
| Training Cost | 0.89 epoch / hour           | 0.32 epoch / hour |

points in the dryer unloading task, while Octo and OpenVLA score 0 points. In tasks like sorting and bin picking hard, DexVLA achieves a score nearly 3 times higher than other baselines. Overall, DexVLA demonstrates its versatility in handling complex tasks through our embodied curriculum learning method, scalable diffusion expert, and novel VLA framework. We believe DexVLA presents a promising approach for building VLA systems capable of managing heterogeneous robotics data and mastering intricate manipulation tasks.

## B.5 Zero-Shot Cross-Embodiment Transfer

Finally, we pose an intriguing question: can DexVLA perform zero-shot cross-embodiment transfer? To explore this, we take a model trained on a simple two-finger gripper and deploy it, without any further training, on a dexterous five-finger hand. Specifically, we use the Stage 2 pre-trained DexVLA — which was trained on a Franka robot equipped with a Robotiq gripper — and swap in a dexterous hand at test time. Because the gripper has only one degree of freedom, we constrain the dexterous hand to a single degree of freedom as well.

We evaluate on a bin-picking task with 30 novel objects that were unseen during both Stage 1 and Stage 2 training. An illustrative example appears in Figure 12, and a full video demonstration is provided in the supplementary material. Across these 30 objects, we achieve an average success rate of 60%. While this is slightly below the 67% success rate attained with the original gripper, it nonetheless underscores the model’s robustness. The performance gap arises from three main challenges: (1) the dexterous hand’s appearance differs markedly from the gripper, forcing the model to generalize its visual feature representations; (2) the wrist camera’s mounting position shifts significantly, requiring adaptation to a new viewpoint; and (3) the difference in hand height changes the effective object grasping height. Although we do not yet control all degrees of freedom needed for fully dexterous manipulation, these results demonstrate that DexVLA’s visual and camera-view representations transfer effectively across embodiments.

## C Ablation Study

### C.1 Does training with substep reasoning help?

A key strength of our method is its ability to handle extremely long and complex tasks, such as folding randomly crumpled shirts from a basket. It also enables the model to complete multi-stage tasks like shirt folding and bin picking without requiring post-training. Therefore, we now examine the importance of sub-step reasoning. We conducted an ablation study with two setups: 1) The diffusion expert is trained with direct prompting (each task has only one language instruction), while the VLA-diffusion expert is trained with sub-step reasoning. 2) Both stage 1 and stage 2 are trained

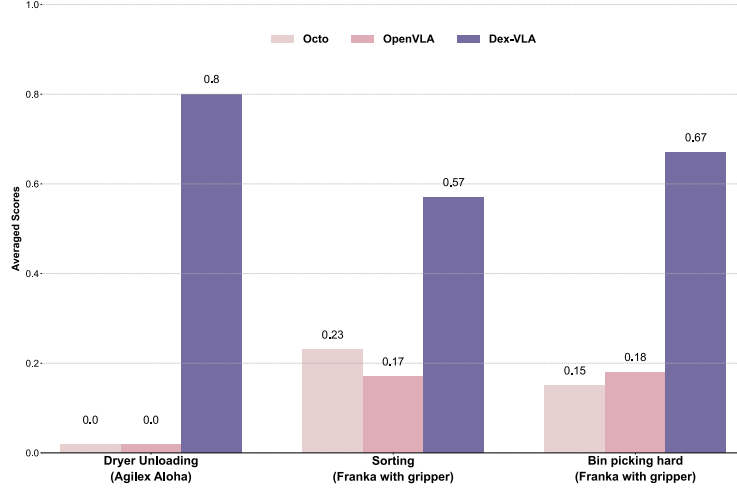

Figure 11: **Average scores on tasks requiring stage 3 training.** We compared our model against two baselines: Octo and OpenVLA. Averaging scores over 10 trials, our method significantly outperformed both baselines across all tasks. Note that sorting was not included in the pre-training data.

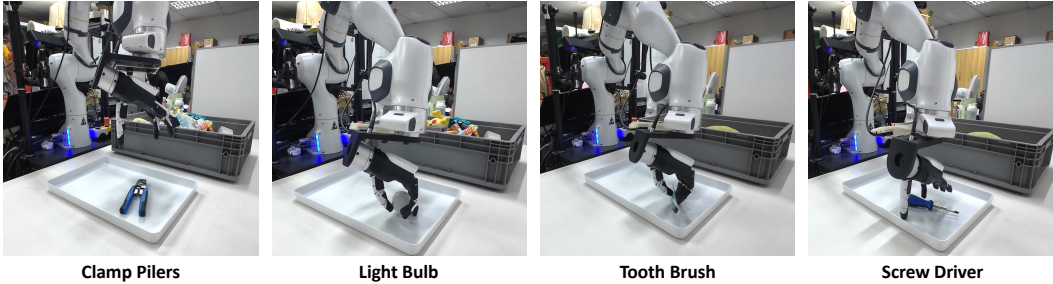

Figure 12: **Robot setup on zero-shot cross-embodiment transfer from gripper to dexterous hand.** We replace the original gripper with an Inspire dexterous hand and evaluate DexVLA in the same bin-picking environment using unseen objects.

573 with direct prompting data. The results are shown in Table 7. Training the diffusion expert with  
 574 direct prompting, even for a relatively simple task like shirt folding, reduces the averaged score  
 575 from 0.92 to 0.07. Furthermore, removing sub-step reasoning from both stages results in a complete  
 576 failure (0 score). This is a significant observation. It suggests that learning long-horizon tasks within  
 577 a shared parameter space can sometimes lead to conflicts. We hypothesize that sub-step reasoning  
 578 allows the model to learn a more disentangled action space, similar to mapping a continuous action  
 579 space to a discrete one [70]. This effectively segments the shared parameter space, allocating a  
 580 smaller set of parameters to each substep [71, 72, 73]. This avoids parameter conflicts, leading to  
 581 improved performance and generalization.

## 582 C.2 Explicit versus implicit sub-step reasoning.

583 The  $\pi_0$  utilizes the additional SayCan to explicitly plan substeps, while DexVLA generates substep  
 584 reasoning implicitly. Here, we evaluate the impact of these two reasoning approaches on overall  
 585 performance. Specifically, we replace DexVLA’s implicit substep reasoning with SayCan’s. As  
 586 shown in Table 8, models using implicit substep reasoning significantly outperform those relying on  
 587 SayCan. The key advantage of implicit substep reasoning is its ability to disentangle the action space  
 588 across different features, allowing DexVLA to learn more effectively. Additionally, SayCan updates  
 589 instructions at a fixed frequency (every two seconds), which can result in redundant or repeated

Table 7: **Ablation study of substep reasoning.** The ✓ in each stage indicates the use of sub-step reasoning data during that stage. We report the average score on the shirt-folding task.

| Stage 1 | Stage 2 | Averaged Score |
|---------|---------|----------------|
| ✓       | ✓       | 0.07           |
| ✓       | ✓       | 0              |
| ✓       | ✓       | 0.92           |

Table 8: **SayCan versus Substep Reasoning for DexVLA.** We replace DexVLA’s substep reasoning with SayCan and evaluate how this change affects overall performance.

| Tasks/Models         | SayCan | Substep Reasoning |
|----------------------|--------|-------------------|
| Bussing Table (Hard) | 0.58   | 0.70              |

states in certain scenarios. In contrast, DexVLA’s substep reasoning adaptively segments the state space over the course of long-horizon tasks, contributing to its superior performance.

## D Task Suite and Evaluation Protocol

### D.1 Task suite.

These tasks are evaluated in Section 3.1.

- **Shirt folding (Bimanual AgileX):** The shirt is placed flattened on the table, and the robot is asked to fold a t-shirt. We evaluate two shirts, a yellow shirt of medium size and a blue shirt of large size.
- **Bin picking easy (Franka with gripper):** The model needs to pick up all items from the right panel to the left tray. All items are seen in the dataset.
- **Bussing table easy (Bimanual AgileX):** The robot must clean a table, place dishes and cutlery in a bin, and trash into a trash bin.

These tasks are evaluated in Section 3.2.

- **Drink pouring (Franka with dexterous hand):** The drink is placed on the right of the table and a cup is placed on the left. The robot needs to grab the drink and pour it into the cup. This task includes 100 demonstrations.
- **Packing (Bimanual UR5):** The robot is asked to pick up objects on both sides and place them into the box for packing. This task includes 100 demonstrations.

These tasks are evaluated in Section 3.3.

- **Laundry folding (Bimanual AgileX):** This task requires a static (non-mobile) bimanual system to fold articles of clothing. The clothing items start in a randomized crumpled state in a bin, and the goal is to take out the item, fold it, and place it on top of a stack of previously folded items. The randomized initial configuration of the crumpled laundry presents a major challenge since the policy needs to generalize to any configuration. This task is present in pre-training.
- **Dryer unloading (Bimanual AgileX):** Here, the AgileX mobile robot has to take the laundry out of a dryer and place it into a hamper. This task is present in pre-training.
- **Sorting (Franka with gripper):** The model needs to pick up all items from the right panel, and place them in the correct subsection of the left tray. The left tray is divided into four subsections. All new objects belong to the same category as these four sections. This task includes 200 demonstrations. This task is not in the pre-training data.



- **Bin picking hard (Franka with gripper):** The model needs to pick up all items from the right panel to the left tray. Unlike the easy version, all objects are new and only present at test time. This task is present in pre-training.
- **Bussing table hard (Bimanual AgileX):** The robot must clean a table, place dishes and cutlery in a bin, and trash into a trash bin. Unlike the easy version, all objects are new. In particular, we use dishes with unseen colors and trash with different appearances. This task is present in pre-training.

## D.2 Evaluation protocol.

Each task is evaluated across 10 trials and reported averaged scores. For each task, we list the detailed scoring criterion as follows.

- **Laundry folding (Bimanual AgileX):** This task is scored out of 4 and we evaluate 5 shirts in total including 2 middle size and 3 small size. We perform two trials for each item, and the items left to be evaluated starting randomly crumpled in a laundry bin (while previously evaluated items start in a fold). One point is given for picking an item out of the bin and putting it on the table. Another point is given for flattening the shirt or shorts. A third point is granted for folding the shirt or shorts. A final point is given for either placing the item in the corner of the table (if it is the first item evaluated), or stacking it onto an existing stack of folded clothes. This evaluation metric is followed  $\pi_0$ .
- **Shirt folding (Bimanual AgileX):** This task is scored out of 3. We perform two trials for each item, and the items are flattened on the table. One point is given for double vertically fold. Another point is granted for a double horizontal fold. A final point is given for pushing the folded shirt to the right blank area.
- **Bussing table (Bimanual AgileX):** This task is scored out of 3-4 where there are 3-4 objects on the table in both **easy and hard version**. The main difference is the objects that appeared in the hard version are unseen. A point is given for each correctly sorted object.
- **Dryer unloading (Bimanual AgileX):** This task is scored out of 2 where there are 2 crumpled shirts in the dryer. A point is given for pick up a shirt and place into the hamper.
- **Sorting (Franka with gripper):** This task is scored out of 5-8 where there are 5-8 objects on the table. There are four kinds of objects in total, a point is given for each correctly sorted object.
- **Drink pouring (Franka with dexterous hand):** This task is scored out of 2. A point is given for grab the bottle and pour to the cup. Another point is granted for place down the bottle.
- **Bining picking (Franka with gripper):** This task is scored out of 4-5 where there are 4-5 objects on the table. The main difference is the objects that appeared in the hard version are unseen. A point is given for each correctly picked and placed object.
- **Packing (Bimanual UR5e):** This task is scored out of 2 where there are 2 objects on the table. A point is given for each correctly picked and placed object.

## E More Implementation Details

### E.1 Robot setup.

Our evaluation is conducted on four different robot configurations across 10 tasks. These setups are summarized in the following list and visualized in figure 4.

- **Franka with gripper.** A Franka Emika robot with 7 degrees of freedom, equipped with a Robotiq parallel jaw gripper. Data is collected at 15Hz.

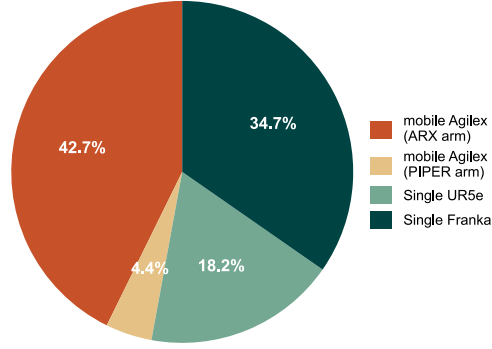

Figure 13: Overview of our dataset for stage 1 training.

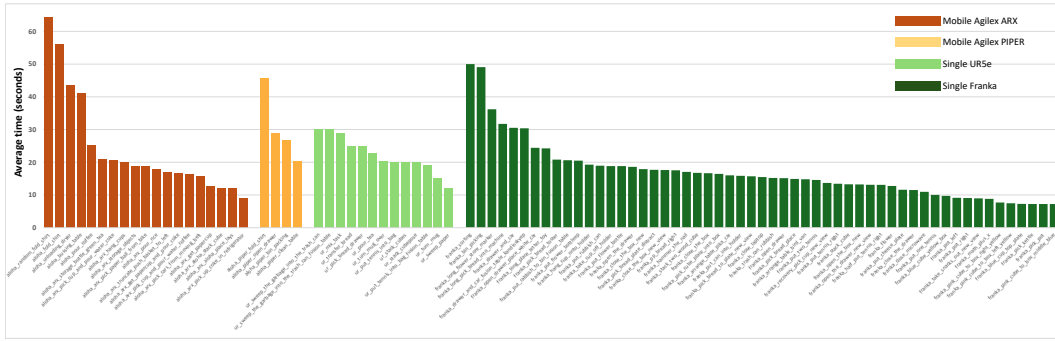

Figure 14: Average task length(seconds) of 91 tasks.

- **Franka with dexterous hand.** An Inspired Dexterous Hand mounted on a Franka Emika robot. The camera setup is identical to the gripper version, with a total of 12-dimensional configuration. Specifically, SE(3) end-effector pose (3D position + 3D orientation) plus 6-dimensional hand joint space. Data is collected at 15Hz.
- **Bimanual UR5e.** Two UR5e robots, each with a Robotiq parallel jaw gripper and a wrist-mounted camera. A top-down camera is positioned between the two arms. This setup has a total of three camera views and a 14-dimensional configuration and action space. Data is collected at 10Hz.
- **Bimanual AgileX.** Two 6-DoF AgileX arms, each with a wrist-mounted camera and a base camera. This setup has a 14-dimensional configuration and action space, supported by three cameras in total. Data is collected at 10Hz.

Our setup includes two Franka Emika robots: one equipped with a gripper and the other with a robot hand. Both Franka robots utilize the same camera configuration, consisting of a ZED 2 camera positioned on both the left and right sides, as well as a ZED Mini wrist camera mounted on the robot itself. Our bimanual UR5e robot uses a single top-mounted Intel RealSense L515 camera and two Intel RealSense 435i cameras attached to the wrists. Finally, our mobile AgileX platform has two Intel RealSense 435i wrist cameras and a top-mounted Intel RealSense 457 camera. Although the mobile AgileX image includes a front camera, it was not used during either training or inference.

## E.2 Sub-step reasoning and data acquisition.

Training with sub-step reasoning is crucial for Dex-VLA to complete long-horizon tasks without a high-level policy model. We present an ablation study on the importance of sub-step reasoning in Section C.1. Acquiring this data presents two key challenges: obtaining language instructions and

687 segmenting videos with corresponding annotations. We address these challenges with the following  
688 strategy.

689 For object-level tasks (e.g., bin picking, sorting, table bussing), object identification is key. We  
690 leverage Grounding-Dino and DINOv2 to annotate object bounding boxes and names, along with  
691 the gripper’s bounding box. We then calculate the intersection over union between the gripper and  
692 object bounding boxes to determine grasp success. For long-horizon single-object tasks (e.g., fold  
693 one shirt), the challenge lies in task segmentation. We created a comprehensive list of potential  
694 sub-step reasoning, focusing on major steps lasting at least five seconds each to avoid excessive  
695 sub-division. We then used Google Gemini 2.0, providing it with the sub-step list, to segment the  
696 videos and select the corresponding reasoning from the list. This proved effective and efficient for  
697 labeling. We only manually checked the Stage 3 training data, as this stage requires higher-quality  
698 annotations. This annotation strategy makes our approach feasible.

### 699 **E.3 Architectural details.**

700 In this section, we provide a full description of the model architecture. Dex-VLA can be split into  
701 two parts, VLM backbone originates from Qwen2-VL [27] and diffusion expert. We use Qwen2-VL  
702 2B which is powerful and efficient. Regarding our Diffusion Expert, the total number of parameters  
703 for this model is 1 billion parameters. We use 32 layers, with the hidden stage of 1280, and a num-  
704 ber of heads of 16. During Stage 1, we only pre-train the diffusion expert with random initialized  
705 ResNet-50 to process images and off-the-shelf Distilbert [31] to encode language instructions. Be-  
706 cause the original diffusion policy model does not support cross-embodiment training, we adopted  
707 a multi-head structure similar to Octo [21]. Each embodiment is assigned a unique MLP head. The  
708 diffusion expert is trained using the similar settings of our Dex-VLA. In particular, we use the im-  
709 age resolution of  $320 \times 240$ , with three camera views. Each image is processed independently to a  
710 ResNet-50. We use the strategy as in RT-1 [33] to initialize the FiLM layers.

### 711 **E.4 Training data details.**

712 As shown in Figure 13. Our dataset comprises approximately 100 hours of collected data spanning  
713 91 distinct tasks. The majority of this data was collected using two robot platforms: the Agilex  
714 (ARX arm) (42.7%) and the single Franka Emika robot (34.7%). The “ARX arm” and “PIPER arm”  
715 represent two distinct robotic arm configurations, both featuring six degrees of freedom (6-DoF) but  
716 differing in their kinematic structures and operational characteristics.

717 Figure 14 provides a summary of all 91 pretraining tasks across four embodiments. The Y-axis  
718 represents the average duration (in seconds) recorded for each task in the training data, while the X-  
719 axis lists all 91 tasks. It is clear that most tasks in the dataset are short-horizon, whereas the evaluated  
720 tasks are long-horizon, highlighting a notable distributional difference between the pretraining data  
721 and the evaluated tasks.



## References

- [1] T. Lin, Y. Zhang, Q. Li, H. Qi, B. Yi, S. Levine, and J. Malik. Learning visuotactile skills with two multifingered hands. *arXiv preprint arXiv:2404.16823*, 2024.
- [2] H. Shi, H. Xu, S. Clarke, Y. Li, and J. Wu. Robocook: Long-horizon elasto-plastic object manipulation with diverse tools. *arXiv preprint arXiv:2306.14447*, 2023.
- [3] F. Lin, Y. Hu, P. Sheng, C. Wen, J. You, and Y. Gao. Data scaling laws in imitation learning for robotic manipulation. *arXiv preprint arXiv:2410.18647*, 2024.
- [4] K. Zhang, Z.-H. Yin, W. Ye, and Y. Gao. Learning manipulation skills through robot chain-of-thought with sparse failure guidance. *arXiv preprint arXiv:2405.13573*, 2024.
- [5] A. Zeng, S. Song, K.-T. Yu, E. Donlon, F. R. Hogan, M. Bauza, D. Ma, O. Taylor, M. Liu, E. Romo, et al. Robotic pick-and-place of novel objects in clutter with multi-affordance grasping and cross-domain image matching. *The International Journal of Robotics Research*, 41(7): 690–705, 2022.
- [6] Y. Qin, Y.-H. Wu, S. Liu, H. Jiang, R. Yang, Y. Fu, and X. Wang. Dexmv: Imitation learning for dexterous manipulation from human videos. In *European Conference on Computer Vision*, pages 570–587. Springer, 2022.
- [7] M. Reuss, Ö. E. Yağmurlu, F. Wenzel, and R. Lioutikov. Multimodal diffusion transformer: Learning versatile behavior from multimodal goals. 2024.
- [8] K. Black, N. Brown, D. Driess, A. Esmail, M. Equi, C. Finn, N. Fusai, L. Groom, K. Hausman, B. Ichter, S. Jakubczak, T. Jones, L. Ke, S. Levine, A. Li-Bell, M. Mothukuri, S. Nair, K. Pertsch, L. X. Shi, J. Tanner, Q. Vuong, A. Walling, H. Wang, and U. Zhilinsky.  $\pi_0$ : A vision-language-action flow model for general robot control, 2024. URL <https://arxiv.org/abs/2410.24164>.
- [9] A. Brohan, N. Brown, J. Carbajal, Y. Chebotar, X. Chen, K. Choromanski, T. Ding, D. Driess, A. Dubey, C. Finn, et al. Rt-2: Vision-language-action models transfer web knowledge to robotic control. *arXiv preprint arXiv:2307.15818*, 2023.
- [10] M. Kim, K. Pertsch, S. Karamcheti, T. Xiao, A. Balakrishna, S. Nair, R. Rafailov, E. Foster, G. Lam, P. Sanketi, Q. Vuong, T. Kollar, B. Burchfiel, R. Tedrake, D. Sadigh, S. Levine, P. Liang, and C. Finn. Openvla: An open-source vision-language-action model. *arXiv preprint arXiv:2406.09246*, 2024.
- [11] Y. Hu, F. Lin, T. Zhang, L. Yi, and Y. Gao. Look before you leap: Unveiling the power of gpt-4v in robotic vision-language planning. *arXiv preprint arXiv:2311.17842*, 2023.
- [12] J. Liu, H. Chen, P. An, Z. Liu, R. Zhang, C. Gu, X. Li, Z. Guo, S. Chen, M. Liu, et al. Hybridvla: Collaborative diffusion and autoregression in a unified vision-language-action model. *arXiv preprint arXiv:2503.10631*, 2025.
- [13] P. Intelligence, K. Black, N. Brown, J. Darpinian, K. Dhabalia, D. Driess, A. Esmail, M. Equi, C. Finn, N. Fusai, et al.  $\pi_0.5$ : a vision-language-action model with open-world generalization. *arXiv preprint arXiv:2504.16054*, 2025.
- [14] M. J. Kim, C. Finn, and P. Liang. Fine-tuning vision-language-action models: Optimizing speed and success. *arXiv preprint arXiv:2502.19645*, 2025.
- [15] G. R. Team, S. Abeyruwan, J. Ainslie, J.-B. Alayrac, M. G. Arenas, T. Armstrong, A. Balakrishna, R. Baruch, M. Bauza, M. Blokzijl, et al. Gemini robotics: Bringing ai into the physical world. *arXiv preprint arXiv:2503.20020*, 2025.

- [16] J. Bjorck, F. Castañeda, N. Cherniadev, X. Da, R. Ding, L. Fan, Y. Fang, D. Fox, F. Hu, S. Huang, et al. Gr00t n1: An open foundation model for generalist humanoid robots. *arXiv preprint arXiv:2503.14734*, 2025.
- [17] Q. Zhao, Y. Lu, M. J. Kim, Z. Fu, Z. Zhang, Y. Wu, Z. Li, Q. Ma, S. Han, C. Finn, et al. Cot-vla: Visual chain-of-thought reasoning for vision-language-action models. *arXiv preprint arXiv:2503.22020*, 2025.
- [18] W. Zhao, P. Ding, M. Zhang, Z. Gong, S. Bai, H. Zhao, and D. Wang. Vlas: Vision-language-action model with speech instructions for customized robot manipulation. *arXiv preprint arXiv:2502.13508*, 2025.
- [19] H. Zhen, X. Qiu, P. Chen, J. Yang, X. Yan, Y. Du, Y. Hong, and C. Gan. 3d-vla: A 3d vision-language-action generative world model. *arXiv preprint arXiv:2403.09631*, 2024.
- [20] M. J. Kim, K. Pertsch, S. Karamcheti, T. Xiao, A. Balakrishna, S. Nair, R. Rafailov, E. Foster, G. Lam, P. Sanketi, et al. Openvla: An open-source vision-language-action model.
- [21] Octo Model Team, D. Ghosh, H. Walke, K. Pertsch, K. Black, O. Mees, S. Dasari, J. Hejna, C. Xu, J. Luo, T. Kreiman, Y. Tan, L. Y. Chen, P. Sanketi, Q. Vuong, T. Xiao, D. Sadigh, C. Finn, and S. Levine. Octo: An open-source generalist robot policy. In *Proceedings of Robotics: Science and Systems*, Delft, Netherlands, 2024.
- [22] A. O’Neill, A. Rehman, A. Gupta, A. Maddukuri, A. Gupta, A. Padalkar, A. Lee, A. Pooley, A. Gupta, A. Mandlekar, et al. Open x-embodiment: Robotic learning datasets and rt-x models. *arXiv preprint arXiv:2310.08864*, 2023.
- [23] Z. Fu, Q. Zhao, Q. Wu, G. Wetzstein, and C. Finn. Humanplus: Humanoid shadowing and imitation from humans. *arXiv preprint arXiv:2406.10454*, 2024.
- [24] H. Ha, Y. Gao, Z. Fu, J. Tan, and S. Song. Umi on legs: Making manipulation policies mobile with manipulation-centric whole-body controllers. *arXiv preprint arXiv:2407.10353*, 2024.
- [25] J. Wu, R. Antonova, A. Kan, M. Lepert, A. Zeng, S. Song, J. Bohg, S. Rusinkiewicz, and T. Funkhouser. Tidybot: Personalized robot assistance with large language models. *Autonomous Robots*, 47(8):1087–1102, 2023.
- [26] F. Xiang, Y. Qin, K. Mo, Y. Xia, H. Zhu, F. Liu, M. Liu, H. Jiang, Y. Yuan, H. Wang, et al. Sapien: A simulated part-based interactive environment. In *Proceedings of the IEEE/CVF conference on computer vision and pattern recognition*, pages 11097–11107, 2020.
- [27] P. Wang, S. Bai, S. Tan, S. Wang, Z. Fan, J. Bai, K. Chen, X. Liu, J. Wang, W. Ge, et al. Qwen2-vl: Enhancing vision-language model’s perception of the world at any resolution. *arXiv preprint arXiv:2409.12191*, 2024.
- [28] H. Liu, C. Li, Q. Wu, and Y. J. Lee. Visual instruction tuning. *Advances in neural information processing systems*, 36, 2024.
- [29] M. Zhu, Y. Zhu, J. Li, J. Wen, Z. Xu, N. Liu, R. Cheng, C. Shen, Y. Peng, F. Feng, et al. Scaling diffusion policy in transformer to 1 billion parameters for robotic manipulation. *arXiv preprint arXiv:2409.14411*, 2024.
- [30] C. Chi, S. Feng, Y. Du, Z. Xu, E. Cousineau, B. Burchfiel, and S. Song. Diffusion policy: Visuomotor policy learning via action diffusion. *arXiv preprint arXiv:2303.04137*, 2023.
- [31] V. Sanh, L. Debut, J. Chaumond, and T. Wolf. Distilbert, a distilled version of bert: Smaller, faster, cheaper and lighter. arxiv 2019. *arXiv preprint arXiv:1910.01108*, 2019.

- [32] L. X. Shi, Z. Hu, T. Z. Zhao, A. Sharma, K. Pertsch, J. Luo, S. Levine, and C. Finn. Yell at your robot: Improving on-the-fly from language corrections. *arXiv preprint arXiv:2403.12910*, 2024.
- [33] A. Brohan, N. Brown, J. Carbajal, Y. Chebotar, J. Dabis, C. Finn, K. Gopalakrishnan, K. Hausman, A. Herzog, J. Hsu, et al. Rt-1: Robotics transformer for real-world control at scale. *arXiv preprint arXiv:2212.06817*, 2022.
- [34] H. Liu, C. Li, Y. Li, and Y. J. Lee. Improved baselines with visual instruction tuning. In *Proceedings of the IEEE/CVF Conference on Computer Vision and Pattern Recognition*, pages 26296–26306, 2024.
- [35] M. Ahn, A. Brohan, N. Brown, Y. Chebotar, O. Cortes, B. David, C. Finn, C. Fu, K. Gopalakrishnan, K. Hausman, et al. Do as i can, not as i say: Grounding language in robotic affordances. *arXiv preprint arXiv:2204.01691*, 2022.
- [36] H.-S. Fang, C. Wang, M. Gou, and C. Lu. Graspnet-1billion: A large-scale benchmark for general object grasping. In *Proceedings of the IEEE/CVF conference on computer vision and pattern recognition*, pages 11444–11453, 2020.
- [37] K. Grauman, A. Westbury, E. Byrne, Z. Chavis, A. Furnari, R. Girdhar, J. Hamburger, H. Jiang, M. Liu, X. Liu, et al. Ego4d: Around the world in 3,000 hours of egocentric video. In *Proceedings of the IEEE/CVF Conference on Computer Vision and Pattern Recognition*, pages 18995–19012, 2022.
- [38] H. Ha, P. Florence, and S. Song. Scaling up and distilling down: Language-guided robot skill acquisition. In *Conference on Robot Learning*, pages 3766–3777. PMLR, 2023.
- [39] I. Radosavovic, T. Xiao, S. James, P. Abbeel, J. Malik, and T. Darrell. Real-world robot learning with masked visual pre-training. In *Conference on Robot Learning*, pages 416–426. PMLR, 2023.
- [40] C. Chi, Z. Xu, C. Pan, E. Cousineau, B. Burchfiel, S. Feng, R. Tedrake, and S. Song. Universal manipulation interface: In-the-wild robot teaching without in-the-wild robots. *arXiv preprint arXiv:2402.10329*, 2024.
- [41] A. Geiger, P. Lenz, C. Stiller, and R. Urtasun. Vision meets robotics: The kitti dataset. *The International Journal of Robotics Research*, 32(11):1231–1237, 2013.
- [42] K. Pertsch, K. Stachowicz, B. Ichter, D. Driess, S. Nair, Q. Vuong, O. Mees, C. Finn, and S. Levine. Fast: Efficient action tokenization for vision-language-action models. *arXiv preprint arXiv:2501.09747*, 2025.
- [43] J. Wen, Y. Zhu, J. Li, M. Zhu, K. Wu, Z. Xu, N. Liu, R. Cheng, C. Shen, Y. Peng, et al. Tinyvla: Towards fast, data-efficient vision-language-action models for robotic manipulation. *arXiv preprint arXiv:2409.12514*, 2024.
- [44] Z. Zhang, K. Zheng, Z. Chen, J. Jang, Y. Li, C. Wang, M. Ding, D. Fox, and H. Yao. Grape: Generalizing robot policy via preference alignment. *arXiv preprint arXiv:2411.19309*, 2024.
- [45] Y. Guo, J. Zhang, X. Chen, X. Ji, Y.-J. Wang, Y. Hu, and J. Chen. Improving vision-language-action model with online reinforcement learning. *arXiv preprint arXiv:2501.16664*, 2025.
- [46] S. Belkhale, T. Ding, T. Xiao, P. Sermanet, Q. Vuong, J. Tompson, Y. Chebotar, D. Dwibedi, and D. Sadigh. Rt-h: Action hierarchies using language. *arXiv preprint arXiv:2403.01823*, 2024.
- [47] L. Yen-Chen, A. Zeng, S. Song, P. Isola, and T.-Y. Lin. Learning to see before learning to act: Visual pre-training for manipulation. In *2020 IEEE International Conference on Robotics and Automation (ICRA)*, pages 7286–7293. IEEE, 2020.

- [48] Y. Du, M. Simchowitz, R. Tedrake, V. Sitzmann, B. Chen, and D. M. Monso. Diffusion forcing: Next-token prediction meets full-sequence diffusion. *NeurIPS*, 3, 2024.
- [49] W. Peebles and S. Xie. Scalable diffusion models with transformers. In *Proceedings of the IEEE/CVF International Conference on Computer Vision*, pages 4195–4205, 2023.
- [50] J. Ho, A. Jain, and P. Abbeel. Denoising diffusion probabilistic models. *Advances in neural information processing systems*, 33:6840–6851, 2020.
- [51] T. Z. Zhao, J. Tompson, D. Driess, P. Florence, S. K. S. Ghasemipour, C. Finn, and A. Wahid. Aloha unleashed: A simple recipe for robot dexterity. In *8th Annual Conference on Robot Learning*.
- [52] Y. Wang, Y. Zhang, M. Huo, R. Tian, X. Zhang, Y. Xie, C. Xu, P. Ji, W. Zhan, M. Ding, et al. Sparse diffusion policy: A sparse, reusable, and flexible policy for robot learning. *arXiv preprint arXiv:2407.01531*, 2024.
- [53] A. Prasad, K. Lin, J. Wu, L. Zhou, and J. Bohg. Consistency policy: Accelerated visuomotor policies via consistency distillation. *arXiv preprint arXiv:2405.07503*, 2024.
- [54] M. Uehara, Y. Zhao, K. Black, E. Hajiramezanali, G. Scalia, N. L. Diamant, A. M. Tseng, T. Biancalani, and S. Levine. Fine-tuning of continuous-time diffusion models as entropy-regularized control. *arXiv preprint arXiv:2402.15194*, 2024.
- [55] M. Uehara, Y. Zhao, K. Black, E. Hajiramezanali, G. Scalia, N. L. Diamant, A. M. Tseng, S. Levine, and T. Biancalani. Feedback efficient online fine-tuning of diffusion models. *arXiv preprint arXiv:2402.16359*, 2024.
- [56] K. Black, M. Janner, Y. Du, I. Kostrikov, and S. Levine. Training diffusion models with reinforcement learning. *arXiv preprint arXiv:2305.13301*, 2023.
- [57] K. Black, M. Nakamoto, P. Atreya, H. Walke, C. Finn, A. Kumar, and S. Levine. Zero-shot robotic manipulation with pretrained image-editing diffusion models. *arXiv preprint arXiv:2310.10639*, 2023.
- [58] S. Dasari, O. Mees, S. Zhao, M. K. Srirama, and S. Levine. The ingredients for robotic diffusion transformers. *arXiv preprint arXiv:2410.10088*, 2024.
- [59] F. Lin, Y. Hu, P. Sheng, C. Wen, J. You, and Y. Gao. Data scaling laws in imitation learning for robotic manipulation, 2024. URL <https://arxiv.org/abs/2410.18647>.
- [60] A. Z. Ren, J. Lidard, L. L. Ankile, A. Simeonov, P. Agrawal, A. Majumdar, B. Burchfiel, H. Dai, and M. Simchowitz. Diffusion policy policy optimization. *arXiv preprint arXiv:2409.00588*, 2024.
- [61] Y. Wang, L. Wang, Y. Du, B. Sundaralingam, X. Yang, Y.-W. Chao, C. Perez-D’Arpino, D. Fox, and J. Shah. Inference-time policy steering through human interactions. *arXiv preprint arXiv:2411.16627*, 2024.
- [62] N. Liu, S. Li, Y. Du, A. Torralba, and J. B. Tenenbaum. Compositional visual generation with composable diffusion models. In *European Conference on Computer Vision*, pages 423–439. Springer, 2022.
- [63] Y. Hu, Y. Guo, P. Wang, X. Chen, Y.-J. Wang, J. Zhang, K. Sreenath, C. Lu, and J. Chen. Video prediction policy: A generalist robot policy with predictive visual representations. *arXiv preprint arXiv:2412.14803*, 2024.
- [64] T.-W. Ke, N. Gkanatsios, and K. Fragkiadaki. 3d diffuser actor: Policy diffusion with 3d scene representations. *arXiv preprint arXiv:2402.10885*, 2024.

- 452 [65] Y. Ze, G. Zhang, K. Zhang, C. Hu, M. Wang, and H. Xu. 3d diffusion policy: Generalizable  
453 visuomotor policy learning via simple 3d representations. In *ICRA 2024 Workshop on 3D*  
454 *Visual Representations for Robot Manipulation*, 2024.
- 455 [66] Y. Ze, Z. Chen, W. Wang, T. Chen, X. He, Y. Yuan, X. B. Peng, and J. Wu. Generalizable  
456 humanoid manipulation with improved 3d diffusion policies. *arXiv preprint arXiv:2410.10803*,  
457 2024.
- 458 [67] G. Yan, Y.-H. Wu, and X. Wang. Dnact: Diffusion guided multi-task 3d policy learning. *arXiv*  
459 *preprint arXiv:2403.04115*, 2024.
- 460 [68] X. Jia, Q. Wang, A. Donat, B. Xing, G. Li, H. Zhou, O. Celik, D. Blessing, R. Lioutikov, and  
461 G. Neumann. Mail: Improving imitation learning with selective state space models. In *8th*  
462 *Annual Conference on Robot Learning*.
- 463 [69] J. Wen, M. Zhu, Y. Zhu, Z. Tang, J. Li, Z. Zhou, C. Li, X. Liu, Y. Peng, C. Shen, et al.  
464 Diffusion-vla: Scaling robot foundation models via unified diffusion and autoregression. *arXiv*  
465 *preprint arXiv:2412.03293*, 2024.
- 466 [70] K. Wu, Y. Zhu, J. Li, J. Wen, N. Liu, Z. Xu, Q. Qiu, and J. Tang. Discrete policy: Learning dis-  
467 entangled action space for multi-task robotic manipulation. *arXiv preprint arXiv:2409.18707*,  
468 2024.
- 469 [71] L. Wang, K. Zhang, A. Zhou, M. Simchowitz, and R. Tedrake. Fleet policy learning via weight  
470 merging and an application to robotic tool-use. *arXiv preprint arXiv:2310.01362*, 2023.
- 471 [72] L. Wang, J. Zhao, Y. Du, E. H. Adelson, and R. Tedrake. Poco: Policy composition from and  
472 for heterogeneous robot learning. *arXiv preprint arXiv:2402.02511*, 2024.
- 473 [73] L. Wang, X. Chen, J. Zhao, and K. He. Scaling proprioceptive-visual learning with heteroge-  
474 neous pre-trained transformers. *arXiv preprint arXiv:2409.20537*, 2024.
